# Supplementary material for: Структурная адаптация организационно-экономической системы в условиях современного предпринимательства
Source: MDPI journal article supplement (doi:10.3390/pathogens11121458), 2002-04-30
Supplement: s1 [file s1]

# Supplementary Materials

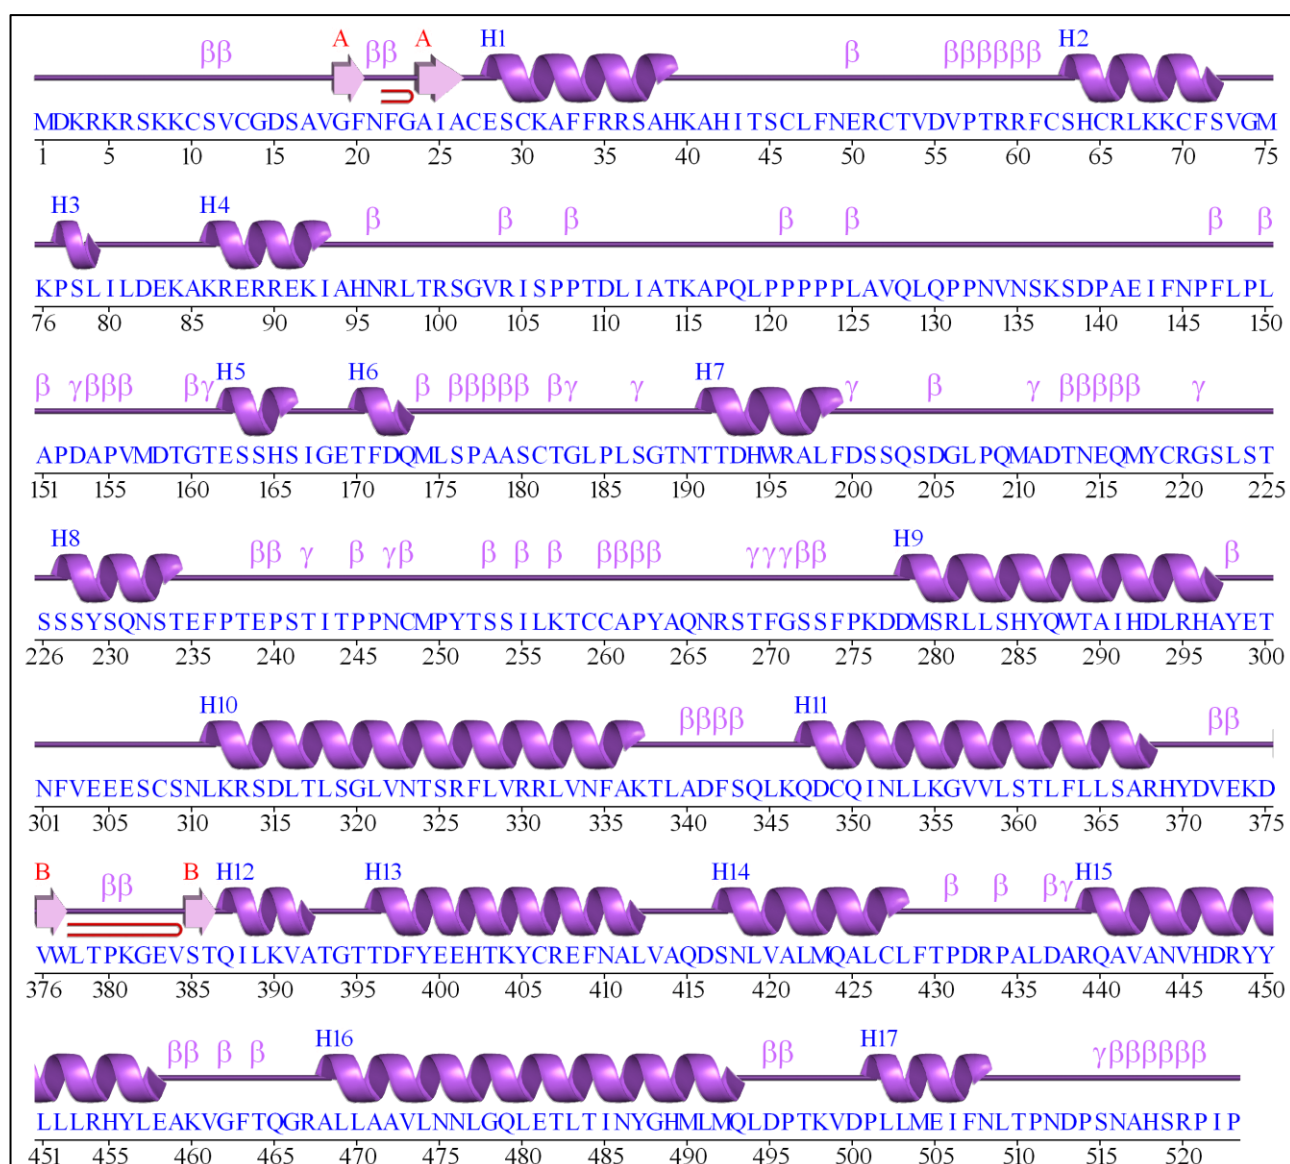

**Figure S1.** Secondary structure of FgNR1 predicted by PDBsum server showing 4 strands, 17 helices, 2 beta hairpins, 73 beta turns, and 20 gamma turns.

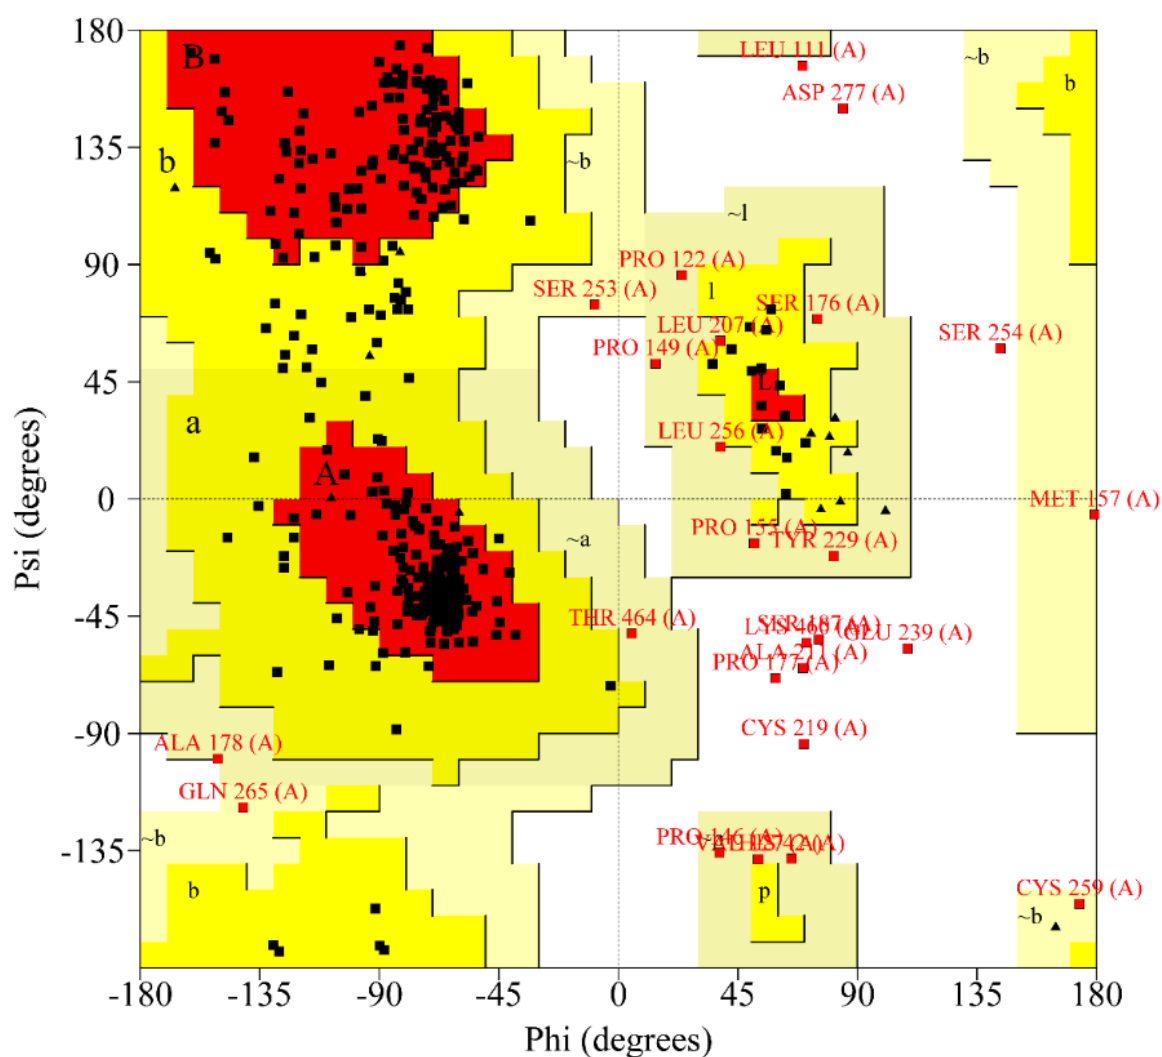

**Figure S2.** Ramachandran plot of FgNR1, produced by PROCHECK (validation of 3D structure). Ramachandran plot revealed that 82.2% of all residues were in most favored regions, 13.5% in additional allowed regions, 2.6% in generously allowed regions, and only 1.7% in disallowed regions.
